# Supplementary material for: Plasmodium vivax GPI-anchored micronemal antigen (PvGAMA) binds human erythrocytes independent of Duffy antigen status
Source: PubMed Central journal article supplement (PMC5069673; doi:10.1038/srep35581), 2016-10-19
Supplement: srep35581-s1.pdf [file srep35581-s1.pdf]

## Supplementary Information

### ***Plasmodium vivax* GPI-anchored micronemal antigen (PvGAMA) binds human erythrocytes independent of Duffy antigen status**

Yang Cheng<sup>1,2,3</sup>, Feng Lu<sup>1,4</sup>, Bo Wang<sup>1,5</sup>, Jian Li<sup>1,6</sup>, Jin-Hee Han<sup>1</sup>, Daisuke Ito<sup>3,7</sup>,  
Deok-Hoon Kong<sup>8</sup>, Lubin Jiang<sup>9</sup>, Jian Wu<sup>3</sup>, Kwon-Soo Ha<sup>5</sup>, Eizo Takashima<sup>7</sup>,  
Jetsumon Sattabongkot<sup>10</sup>, Jun Cao<sup>4</sup>, Myat Htut Nyunt<sup>1,11</sup>, Myat Phone Kyaw<sup>11</sup>,  
Sanjay A. Desai<sup>3</sup>, Louis H. Miller<sup>3</sup>, Takafumi Tsuboi<sup>7</sup> & Eun-Taek Han<sup>1</sup>



masks indicate conserved Asn residues region. High conserved region between PvGAMA and PfGAMA was marked with green. Blue line indicated PvGAMA-F2. Ala/Asn-riched region marked with red at the C-terminus of PfGAMA. Dashes indicate a deletion. Asterisks, colons and dots under the alignment indicated identical, conserved, and semi-conserved substitutions, respectively, based on BLOSUM.

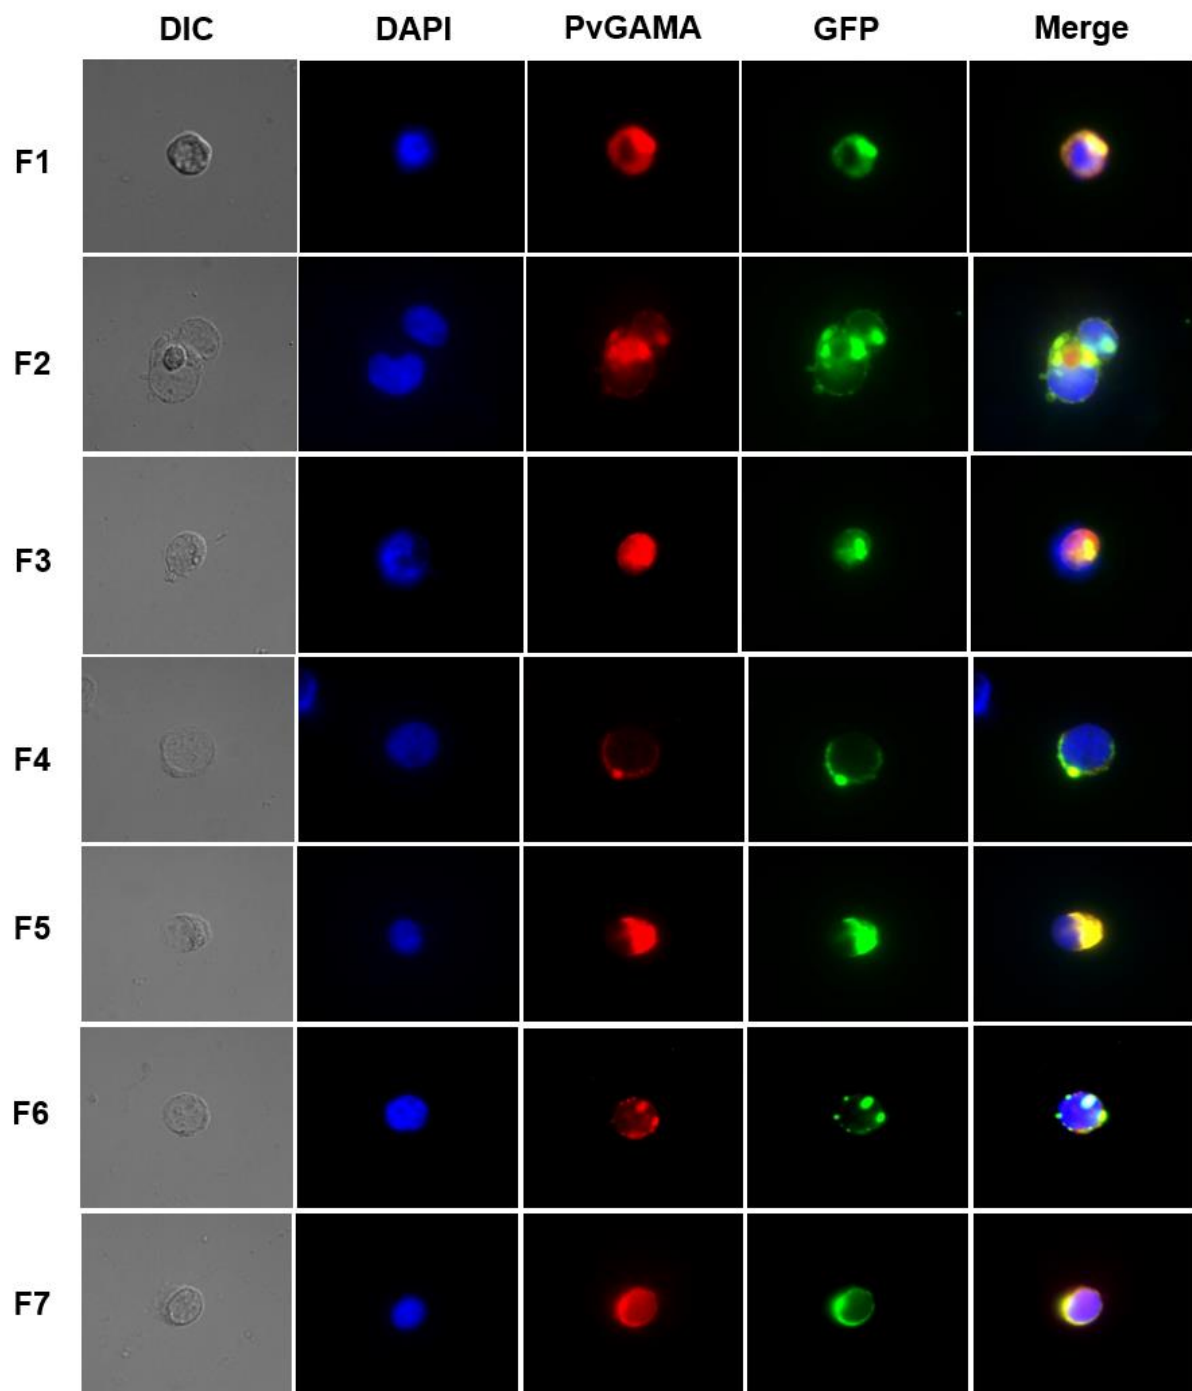

**Supplementary Figure S2. Transfection induced expression of PvDBPII and PvGAMA fragments on the surface of HEK 293T cells.** Expression of PvDBPII and each fragment of PvGAMA on HEK 293T cells transfected with pEGFP-HSVgD1\_PvDBPII, and \_PvGAMA-F1 to -F7 (Fig. 1a) plasmid DNA were detected by IFA. Green fluorescent protein (GFP) (green, control), Alexa Fluor 568-conjugated goat anti-rabbit antibody (red, PvGAMA fragments) were used and visualized by confocal microscopy. Rabbit antisera against Phosphate-buffered saline (PBS) was used as negative control.
